# Supplementary material for: Fusarium oxysporum f.sp. ciceri Race 1 Induced Redox State Alterations Are Coupled to Downstream Defense Signaling in Root Tissues of Chickpea (Cicer arietinum L.)
Source: PubMed Central journal article supplement (PMC3772884; doi:10.1371/journal.pone.0073163), 2013-09-13
Supplement: pone.0073163.s004.pdf [file pone.0073163.s004.pdf]

|                                                |                                                | NAME OF THE GENE                 | Symbol      | 1 DP        | 1.5 DP   | 2 DP     | 3 DP     | 4 DP     | 7 DP     |
|------------------------------------------------|------------------------------------------------|----------------------------------|-------------|-------------|----------|----------|----------|----------|----------|
| REDOX SENSITIVE GENES                          | ROS Generators and scavengers                  | RESPIRATORY BURST OXIDOREDUCTASE | ICAD        | 2.81709198  | 1.022849 | 0.189356 | 2.366126 | 2.094009 | 1.448910 |
|                                                |                                                | PEROXIDASE                       | WR 325      | 0.86205279  | 0.220823 | 0.000000 | 0.400483 | 0.787888 | 0.580447 |
|                                                |                                                | CATIONIC PEROXIDASE              | WR 325      | 1.41761564  | 0.8202   | 0.027595 | 0.300120 | 0.771238 | 1.967449 |
|                                                |                                                | SUPEROXIDE DISMUTASE             | WR 325      | 0.79947794  | 0.608818 | 0.081024 | 0.891201 | 0.872051 | 0.784808 |
|                                                |                                                | GLUTATHIONE S TRANSFERASE        | ICAD        | 0.81188302  | 1.130501 | 0.850575 | 0.479525 | 0.164611 | 0.549031 |
|                                                |                                                |                                  | WR 325      | 0.00403125  | 0.427646 | 0.000000 | 1.021254 | 0.112021 | 1.67818  |
|                                                | Cytosome dependent redox signal transducers    | CYTOSOL Fe REDUCTASE             | ICAD        | 4.36714005  | 3.330274 | 0.057894 | 1.844002 | 1.444141 | 0.058647 |
|                                                |                                                | CYTB                             | WR 325      | 0.69709197  | 0.000000 | 0.000000 | 0.000000 | 0.000000 | 0.000000 |
|                                                |                                                | INDUCIBLE N REDUCTASE            | WR 325      | 0.00000000  | 0.000000 | 0.000000 | 0.000000 | 0.000000 | 0.000000 |
|                                                | Intracellular ROS signal transducers           | NADPH OXIDOREDUCTASE             | ICAD        | 0.53216630  | 0.826707 | 0.108424 | 2.012078 | 0.709011 | 2.120888 |
|                                                |                                                | GINKGONE OXIDOREDUCTASE          | ICAD        | 1.00021587  | 1.137819 | 4.138831 | 0.218489 | 0.1478   | 1.050714 |
|                                                |                                                | Fe(O) OXIDOREDUCTASE             | WR 325      | 0.38180388  | 3.144017 | 0.272894 | 0.867327 | 0.044201 | 0.083889 |
|                                                |                                                | THIOREDOXIN                      | WR 325      | 0.00561783  | 0.000000 | 1.44651  | 0.000000 | 0.000000 | 0.000000 |
|                                                |                                                | APase                            | WR 325      | 1.81474105  | 0.009784 | 0.649129 | 1.413888 | 0.181380 | 0.006378 |
|                                                |                                                |                                  | WR 325      | 2.78789327  | 1.994914 | 0.064105 | 0.330349 | 0.147458 | 0.580447 |
|                                                | Intracellular transporters                     | ABC TRANSPORTER                  | ICAD        | 0.70803069  | 0.456274 | 1.431664 | 0.759326 | 1.611901 | 2.028920 |
|                                                |                                                | SUBSTRATE TRANSPORTER            | WR 325      | 0.00000000  | 0.000000 | 0.000000 | 0.000000 | 0.000000 | 0.000000 |
|                                                |                                                | HEAVY METAL TRANSPORTER          | WR 325      | 0.17181949  | 0.000000 | 0.000000 | 0.000000 | 0.000000 | 0.000000 |
| TRACOLOCASE                                    |                                                | WR 325                           | 0.00000000  | 0.000000    | 0.000000 | 0.000000 | 0.000000 | 0.000000 |          |
| POLYCL TRANSPORTER PROTEIN                     |                                                | ICAD                             | 0.00000000  | 0.000000    | 0.000000 | 0.000000 | 0.000000 | 0.000000 |          |
|                                                |                                                | WR 325                           | 4.59486022  | 4.438839    | 0.000000 | 0.864914 | 0.757131 | 0.82380  |          |
| Cellular trafficking transporters              | VACUOLAR SORTING RECEPTOR                      | WR 325                           | 0.688973278 | 1.208674    | 1.433188 | 0.084312 | 0.000000 | 0.000000 |          |
|                                                | GLATHIN COAT ASSEMBLY PROTEIN                  | WR 325                           | 0.00000000  | 0.000000    | 0.000000 | 0.000000 | 0.000000 | 0.000000 |          |
|                                                | SECRETORY VESICLE MEMBRANE PROTEIN             | WR 325                           | 2.373894306 | 0.886219    | 0.686994 | 1.380208 | 1.957625 | 2.178909 |          |
|                                                | NUCLEAR PORE COMPLEX PROTEIN                   | ICAD                             | 2.04541478  | 0.825893    | 0.298977 | 3.809916 | 0.279488 | 0.148098 |          |
|                                                | INTRINSIC PROTEIN OF TONOLAST                  | WR 325                           | 0.00000000  | 0.000000    | 0.000000 | 0.000000 | 0.000000 | 0.000000 |          |
|                                                |                                                | WR 325                           | 0.504071878 | 0.688276    | 1.78794  | 0.28492  | 0.788201 | 2.177525 |          |
| Intercellular transportation signal generators | TGFA (R) SIGNALING FACTOR                      | ICAD                             | 2.40045501  | 0.172885    | 1.688901 | 1.280538 | 0.621204 | 0.594518 |          |
|                                                | TYPE B Ca <sup>2+</sup> ATPase                 | ICAD                             | 0.12184981  | 0.080917    | 0.283978 | 0.366848 | 1.17031  | 0.004748 |          |
|                                                |                                                | WR 325                           | 0.67213935  | 0.258632    | 0.238181 | 0.147488 | 1.58781  | 0.489332 |          |
| TRANSCRIPTION FACTORS                          | Transcription factors containing basic domains | N/PT TRANSCRIPTION FACTOR        | ICAD        | 0.807023218 | 0.460548 | 0.887882 | 0.780575 | 1.01701  | 0.762899 |
|                                                |                                                | HOMEOBOX HELIX LOOP ZIPPER       | WR 325      | 2.33783793  | 0.451977 | 0.000000 | 0.10175  | 0.000000 | 0.383229 |
|                                                |                                                | MYB TRANSCRIPTION FACTOR         | WR 325      | 0.94271397  | 0.120572 | 0.078511 | 0.081849 | 0.031801 | 0.008948 |
|                                                |                                                | HNF TRANSCRIPTION FACTOR         | WR 325      | 0.20121215  | 0.099818 | 0.000000 | 0.02205  | 1.894824 | 0.000175 |
|                                                |                                                |                                  | WR 325      | 0.14279381  | 0.218891 | 0.41414  | 0.131008 | 0.387028 | 0.148128 |
|                                                |                                                |                                  | WR 325      | 4.11234964  | 0.190273 | 0.000000 | 0.380502 | 0.817108 | 0.000000 |
|                                                | Transcription factor associates                | HEAT SHOCK FACTOR                | ICAD        | 0.813441864 | 1.105015 | 0.500028 | 1.79405  | 2.45261  | 0.400957 |
|                                                |                                                |                                  | WR 325      | 1.41214771  | 1.200547 | 0.000000 | 0.328840 | 4.817887 | 2.427020 |
|                                                |                                                |                                  | WR 325      | 0.00000000  | 0.000000 | 0.434851 | 0.147896 | 1.660578 | 0.124400 |
|                                                |                                                |                                  | WR 325      | 0.631058402 | 1.994741 | 0.780327 | 0.155916 | 0.874885 | 2.090238 |
|                                                |                                                |                                  | WR 325      | 0.31955193  | 0.882894 | 0.881124 | 0.184382 | 0.925455 | 0.980848 |
|                                                |                                                |                                  | WR 325      | 0.241788218 | 0.482571 | 0.128125 | 0.064589 | 0.000963 | 0.070758 |
| SUGAR METABOLISMS                              | POLYMERIZATION TRANSFERASE                     | ICAD                             | 2.598620478 | 0.589539    | 0.248787 | 0.401485 | 3.713888 | 0.929605 |          |
|                                                |                                                | WR 325                           | 0.408427028 | 0.181891    | 1.020208 | 0.001128 | 0.044751 | 0.002151 |          |
|                                                | INOSITOL FACTOR                                | ICAD                             | 0.00000000  | 0.000000    | 0.000000 | 0.000000 | 0.000000 | 0.000000 |          |
|                                                |                                                | WR 325                           | 4.21897093  | 0.000000    | 0.731152 | 1.914091 | 0.000000 | 0.000000 |          |
|                                                |                                                | WR 325                           | 4.495828253 | 1.598854    | 0.080529 | 1.281501 | 0.000000 | 1.883314 |          |
|                                                |                                                | WR 325                           | 1.508267189 | 1.407025    | 0.000000 | 0.7998   | 0.000000 | 1.486617 |          |

↓ 0.5 fold and below  
↘ 0.5 to 1 fM  
↘ Basal expression (1 to 2 fM)  
↘ 2 to 5 fM  
↑ 5 fold and above

Basal expression  
 0.5 fold and below  
 0.5 to 1 fM  
 1 to 2 fM  
 2 to 5 fM  
 5 fold and above
