# Supplementary material for: Fusarium oxysporum f.sp. ciceri Race 1 Induced Redox State Alterations Are Coupled to Downstream Defense Signaling in Root Tissues of Chickpea (Cicer arietinum L.)
Source: PubMed Central journal article supplement (PMC3772884; doi:10.1371/journal.pone.0073163), 2013-09-13

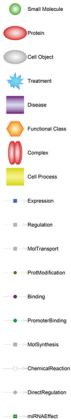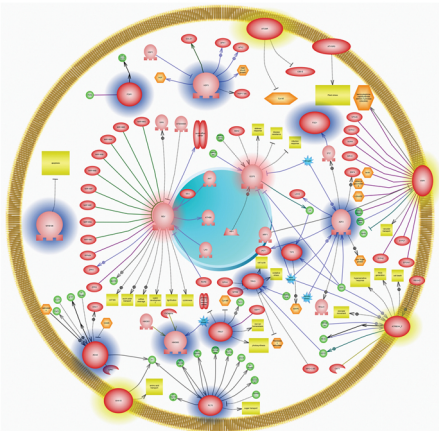

Supplement: pone.0073163.s008.pdf [file pone.0073163.s008.pdf]
