# Supplementary material for: Fusarium oxysporum f.sp. ciceri Race 1 Induced Redox State Alterations Are Coupled to Downstream Defense Signaling in Root Tissues of Chickpea (Cicer arietinum L.)
Source: PubMed Central journal article supplement (PMC3772884; doi:10.1371/journal.pone.0073163), 2013-09-13

- Small Molecule
- Protein
- Cell Object
- ★ Treatment
- Disease
- Functional Class
- ⊞ Complex
- Cell Process
- ➔ Expression
- ➔ Regulation
- ➔ MolTransport
- ➔ ProtModification
- ➔ Binding
- ➔ PromoterBinding
- ➔ MolSynthesis
- ➔ ChemicalReaction
- ➔ DirectRegulation
- ➔ miRNAEffect

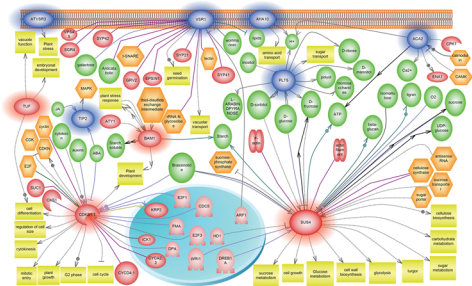

Supplement: pone.0073163.s010.pdf [file pone.0073163.s010.pdf]
